# Supplementary material
Source: PubMed Central journal article supplement (PMC4433007)
Supplement: NIHMS368969-supplement-Supplement.pdf [file NIHMS368969-supplement-Supplement.pdf]

**Table 1. Bacterial strains.**

| Strain | Relevant Genotype                                                                              | Plasmids | Source                              |
|--------|------------------------------------------------------------------------------------------------|----------|-------------------------------------|
| AB1157 | <i>thr-1 leu-6 thi-1 lacY1 galK2 ara-14 xyl-5 mtl-1 proA2 his-4 argE3 str-31 tsx-33 sup-37</i> |          | Bachmann (1987)                     |
| BB078  | AB1157                                                                                         | pKD46    | Wanner (2000)                       |
| JC9941 | <i>recA200</i> (Ts)                                                                            |          | A.J. Clark                          |
| SK129  | <i>recB270</i> (Ts) <i>recC271</i> (Ts)                                                        |          | Kushner (1974)                      |
| JB29   | AB1157 $\Delta$ <i>rdgB62</i>                                                                  |          | Bradshaw and Kuzminov (2003)        |
| JB30   | JC9941 $\Delta$ <i>rdgB62</i>                                                                  |          | Bradshaw and Kuzminov (2003)        |
| JB36   | SK129 $\Delta$ <i>rdgB62</i>                                                                   |          | Bradshaw and Kuzminov (2003)        |
| AK107  | SK129 <i>dut-1</i>                                                                             |          | Kouzminova (2004)                   |
| BB006  | AB1157 $\Delta$ <i>deoB::cat</i>                                                               |          | Deletion-replacement                |
| BB324  | JC9941 $\Delta$ <i>deoB</i>                                                                    |          | JC9941 x P1 BB006, <i>cat</i> FLPed |
| BB007  | JB29 $\Delta$ <i>deoB</i>                                                                      | pK96     | JB29 x P1 BB006, <i>cat</i> FLPed   |
| BB004  | JB30 $\Delta$ <i>deoB</i>                                                                      |          | JB30 x P1 BB006, <i>cat</i> FLPed   |
| BB005  | JB36 $\Delta$ <i>deoB</i>                                                                      |          | JB36 x P1 BB006, <i>cat</i> FLPed   |
| BB014  | AB1157 $\Delta$ <i>deoD::cat</i>                                                               |          | Deletion-replacement                |
| BB325  | JC9941 $\Delta$ <i>deoD</i>                                                                    |          | JC9941 x P1 BB014, <i>cat</i> FLPed |
| BB015  | JB29 $\Delta$ <i>deoD</i>                                                                      | pK96     | JB29 x P1 BB014, <i>cat</i> FLPed   |
| BB012  | JB30 $\Delta$ <i>deoD</i>                                                                      |          | JB30 x P1 BB014, <i>cat</i> FLPed   |
| BB013  | JB36 $\Delta$ <i>deoD</i>                                                                      |          | JB36 x P1 BB014, <i>cat</i> FLPed   |
| BB022  | AB1157 $\Delta$ <i>dusB::cat</i>                                                               |          | Deletion-replacement                |
| BB322  | JC9941 $\Delta$ <i>dusB</i>                                                                    |          | JC9941 x P1 BB022, <i>cat</i> FLPed |
| BB023  | JB29 $\Delta$ <i>dusB</i>                                                                      | pK96     | JB29 x P1 BB022, <i>cat</i> FLPed   |
| BB020  | JB30 $\Delta$ <i>dusB</i>                                                                      |          | JB30 x P1 BB022, <i>cat</i> FLPed   |
| BB021  | JB36 $\Delta$ <i>dusB</i>                                                                      |          | JB36 x P1 BB022, <i>cat</i> FLPed   |
| BB030  | AB1157 $\Delta$ <i>hpt::cat</i>                                                                |          | Deletion-replacement                |
| BB327  | JC9941 $\Delta$ <i>hpt</i>                                                                     |          | JC9941 x P1 BB030, <i>cat</i> FLPed |
| BB031  | JB29 $\Delta$ <i>hpt</i>                                                                       | pK96     | JB29 x P1 BB030, <i>cat</i> FLPed   |
| BB028  | JB30 $\Delta$ <i>hpt</i>                                                                       |          | JB30 x P1 BB030, <i>cat</i> FLPed   |
| BB029  | JB36 $\Delta$ <i>hpt</i>                                                                       |          | JB36 x P1 BB030, <i>cat</i> FLPed   |
| BB038  | AB1157 $\Delta$ <i>dgt::cat</i>                                                                |          | Deletion-replacement                |
| BB333  | JC9941 $\Delta$ <i>dgt</i>                                                                     |          | JC9941 x P1 BB038, <i>cat</i> FLPed |
| BB039  | JB29 $\Delta$ <i>dgt</i>                                                                       | pK96     | JB29 x P1 BB038, <i>cat</i> FLPed   |
| BB036  | JB30 $\Delta$ <i>dgt</i>                                                                       |          | JB30 x P1 BB038, <i>cat</i> FLPed   |
| BB037  | JB36 $\Delta$ <i>dgt</i>                                                                       |          | JB36 x P1 BB038, <i>cat</i> FLPed   |
| BB046  | AB1157 $\Delta$ <i>tdk::cat</i>                                                                |          | Deletion-replacement                |
| BB329  | JC9941 $\Delta$ <i>tdk</i>                                                                     |          | JC9941 x P1 BB046, <i>cat</i> FLPed |
| BB047  | JB29 $\Delta$ <i>tdk</i>                                                                       | pK96     | JB29 x P1 BB046, <i>cat</i> FLPed   |
| BB044  | JB30 $\Delta$ <i>tdk</i>                                                                       |          | JB30 x P1 BB046, <i>cat</i> FLPed   |
| BB045  | JB36 $\Delta$ <i>tdk</i>                                                                       |          | JB36 x P1 BB046, <i>cat</i> FLPed   |
| BB090  | AB1157 <i>gmk::cat</i>                                                                         |          | Deletion-replacement                |
| BB341  | JC9941 $\Delta$ <i>gmk::cat</i>                                                                |          | JC9941 x P1 BB090                   |
| BB094  | JB29 <i>gmk::cat</i>                                                                           | pK96     | JB29 x P1 BB090                     |
| BB091  | JB30 <i>gmk::cat</i>                                                                           |          | JB30 x P1 BB090                     |
| BB092  | JB36 <i>gmk::cat</i>                                                                           |          | JB36 x P1 BB090                     |
| BB101  | AB1157 $\Delta$ <i>purR::cat</i>                                                               |          | Deletion-replacement                |
| BB332  | JC9941 $\Delta$ <i>purR</i>                                                                    |          | JC9941 x P1 BB101, <i>cat</i> FLPed |
| BB106  | JB29 $\Delta$ <i>purR</i>                                                                      | pK96     | JB29 x P1 BB101, <i>cat</i> FLPed   |
| BB104  | JB30 $\Delta$ <i>purR</i>                                                                      |          | JB30 x P1 BB101, <i>cat</i> FLPed   |

|       |                                              |              |                                     |
|-------|----------------------------------------------|--------------|-------------------------------------|
| BB105 | JB36 $\Delta purR$                           |              | JB36 x P1 BB101, <i>cat</i> FLPed   |
| BB107 | AB1157 $\Delta nfi::cat$                     |              | Deletion-replacement                |
| BB326 | JC9941 $\Delta nfi$                          |              | JC9941 x P1 BB107, <i>cat</i> FLPed |
| BB112 | JB29 $\Delta nfi$                            | pK96         | JB29 x P1 BB107, <i>cat</i> FLPed   |
| BB110 | JB30 $\Delta nfi$                            |              | JB30 x P1 BB107, <i>cat</i> FLPed   |
| BB111 | JB36 $\Delta nfi$                            |              | JB36 x P1 BB107, <i>cat</i> FLPed   |
| BB095 | AB1157 $\Delta rpoC::cat$                    |              | Deletion-replacement                |
| BB323 | JC9941 $\Delta rpoC$                         |              | JC9941 x P1 BB095, <i>cat</i> FLPed |
| BB120 | JB29 $\Delta rpoC::cat$                      | pK96         | JB29 x P1 BB095                     |
| BB118 | JB30 $\Delta rpoC::cat$                      |              | JB30 x P1 BB095                     |
| BB119 | JB36 $\Delta rpoC::cat$                      |              | JB36 x P1 BB095                     |
| BB099 | JB36 $\Delta rpoC$                           |              | JB36 x P1 BB095, <i>cat</i> FLPed   |
| b3283 | MG1655 $\Delta yrdD::aph$                    |              | ECK3270 from Keio Collection        |
| BB328 | JC9941 $\Delta yrdD$                         |              | JC9941 x P1 b3283, <i>aph</i> FLPed |
| BB156 | JB29 $\Delta yrdD$                           | pK96         | JB29 x P1 b3283, <i>aph</i> FLPed   |
| BB150 | JB30 $\Delta yrdD$                           |              | JB30 x P1 b3283, <i>aph</i> FLPed   |
| BB151 | JB36 $\Delta yrdD$                           |              | JB36 x P1 b3283, <i>aph</i> FLPed   |
| b1014 | MG1655 $\Delta putA::aph$                    |              | ECK1005 from Keio Collection        |
| BB330 | JC9941 $\Delta putA$                         |              | JC9941 x P1 b1014, <i>aph</i> FLPed |
| BB129 | JB29 $\Delta putA$                           | pK96         | JB29 x P1 b1014, <i>aph</i> FLPed   |
| BB127 | JB30 $\Delta putA$                           |              | JB30 x P1 b1014, <i>aph</i> FLPed   |
| BB128 | JB36 $\Delta putA$                           |              | JB36 x P1 b1014, <i>aph</i> FLPed   |
| b1015 | MG1655 $\Delta putP::aph$                    |              | ECK1006 from Keio Collection        |
| BB138 | JB29 $\Delta putP$                           | pK96         | JB29 x P1 b1015, <i>aph</i> FLPed   |
| BB136 | JB30 $\Delta putP$                           |              | JB30 x P1 b1015, <i>aph</i> FLPed   |
| BB137 | JB36 $\Delta putP$                           |              | JB36 x P1 b1015, <i>aph</i> FLPed   |
| BB337 | JB30 $\Delta putP::aph$                      |              | pRL27 insertion                     |
| BB335 | JC9941 $\Delta putP::aph$                    |              | pRL27 insertion                     |
| b1877 | MG1655 $\Delta yecT::aph$                    |              | ECK1878 from Keio Collection        |
| BB147 | JB29 $\Delta yecT$                           | pK96         | JB29 x P1 b1877, <i>aph</i> FLPed   |
| BB145 | JB30 $\Delta yecT$                           |              | JB30 x P1 b1877, <i>aph</i> FLPed   |
| BB146 | JB36 $\Delta yecT$                           |              | JB36 x P1 b1877, <i>aph</i> FLPed   |
| BB336 | JB30 $\Delta yecT::aph$                      |              | pRL27 insertion                     |
| BB334 | JC9941 $\Delta yecT::aph$                    |              | pRL27 insertion                     |
| BB257 | JB29, contains high copy <i>purA</i> plasmid | pK96, pBBMC1 |                                     |
| BB258 | JB29, contains high copy <i>yjiX</i> plasmid | pK96, pBBMC2 |                                     |
| BB260 | JB29, contains high copy <i>rmB</i> plasmid  | pK96, pBBMC4 |                                     |
| BB261 | JB29, contains high copy <i>nepl</i> plasmid | pK96, pBBMC5 |                                     |
| BB263 | JB30, contains high copy <i>purA</i> plasmid | pBBMC1       |                                     |
| BB264 | JB30, contains high copy <i>yjiX</i> plasmid | pBBMC2       |                                     |
| BB266 | JB30, contains high copy <i>rmB</i> plasmid  | pBBMC4       |                                     |
| BB267 | JB30, contains high copy <i>nepl</i> plasmid | pBBMC5       |                                     |
| BB269 | JB36, contains high copy <i>purA</i> plasmid | pBBMC1       |                                     |
| BB270 | JB36, contains high copy <i>yjiX</i> plasmid | pBBMC2       |                                     |
| BB272 | JB36, contains high copy <i>rmB</i> plasmid  | pBBMC4       |                                     |
| BB273 | JB36, contains high copy <i>nepl</i> plasmid | pBBMC5       |                                     |

**Table 2.** Primer sequences used to amplify *deoBD*, *dgt*, *hpt*, *nfi*, *purR*, and *tdk* from the *E. coli* AB1157 genome.

| Primer Name | Sequence (5' to 3')                        | Engineered Restriction Site | 5' end of Primer Binding Site |
|-------------|--------------------------------------------|-----------------------------|-------------------------------|
| deoBD-L     | acatgcatgcatgtgcacaccaactgtctatcgc         | SphI                        | 4617559                       |
| deoBD-R     | catgccatggcatgaagccggagcagtcctccc          | NcoI                        | 4619684                       |
| dgt-L       | catgccatggcatggtatagatttcgcaaccgcc         | NcoI                        | 179049                        |
| dgt-R       | ccccccgggggggtgttcttcagattcgTTTTatagcc     | XmaI                        | 180845                        |
| hpt-L       | ccgctcgagcgggagtaatcgtcgagcgc              | XhoI                        | 141190                        |
| hpt-R       | ccatcgatggaacctcaagctgaaacacgc             | Clal                        | 142040                        |
| nfi-L2      | cccatcgatgggaggaggacagctgtgattatggatctcgcg | Clal                        | 4196807                       |
| nfi-R       | acatgcatgcatgtcagacgcagatgaattggg          | SphI                        | 4197556                       |
| purR-L      | ccccccggggggccacacaaaaagtgatattacgc        | XmaI                        | 1735592                       |
| purR-R      | gctctagagcgacgctgaataaggagtggc             | XbaI                        | 1736947                       |
| tdk-L       | gctctagagctatgcaaggcttcgtaaggg             | XbaI                        | 1292626                       |
| tdk-R       | gctctagagctaagagccctgtgaggcg               | XbaI                        | 1293496                       |

**Table 3. Plasmids used in this study.**

| Plasmid   | Description                                                                                                                                                                                                                                                                      | Source     |
|-----------|----------------------------------------------------------------------------------------------------------------------------------------------------------------------------------------------------------------------------------------------------------------------------------|------------|
| pMTL22    | High copy pUC8-based cloning vector                                                                                                                                                                                                                                              | [1]        |
| pK80      | Low copy plasmid vector                                                                                                                                                                                                                                                          | [2]        |
| pK96      | 22.5 kbp plasmid used for EndoV study                                                                                                                                                                                                                                            | [2]        |
| pBB01     | <i>deoBD</i> PCR product inserted into SphI and NcoI of pMTL22                                                                                                                                                                                                                   | This study |
| pBB02     | <i>dgt</i> PCR product inserted into NcoI and XmaI of pMTL22                                                                                                                                                                                                                     | This study |
| pBB03     | <i>hpt</i> PCR product inserted into XhoI and ClaI of pMTL22                                                                                                                                                                                                                     | This study |
| pBB04     | <i>nfi</i> PCR product inserted into ClaI and SphI of pMTL22                                                                                                                                                                                                                     | This study |
| pBB05     | <i>purR</i> PCR product inserted into XmaI and XbaI of pMTL22                                                                                                                                                                                                                    | This study |
| pBB06     | <i>tdk</i> PCR product inserted into XbaI of pMTL22, co-directional with <i>bla</i>                                                                                                                                                                                              | This study |
| pBB07     | <i>hpt</i> from pBB03 cloned into pBB01 using XbaI and ClaI                                                                                                                                                                                                                      | This study |
| pBB08     | <i>purR</i> from pBB05 cloned into pBB07 using XmaI and XbaI                                                                                                                                                                                                                     | This study |
| pBB09     | <i>dgt</i> from pBB02 cloned into pBB08 using NcoI and XmaI                                                                                                                                                                                                                      | This study |
| pBB10     | <i>nfi</i> from pBB04 cloned into pBB09 using ClaI and SphI                                                                                                                                                                                                                      | This study |
| pBB11     | <i>tdk</i> from pBB06 cloned into pBB10 using XbaI                                                                                                                                                                                                                               | This study |
| pBB13     | 7909 bp BamHI-XhoI fragment from pBB11 ligated to pK80 cut with BamHI and XhoI                                                                                                                                                                                                   | This study |
| pBBMC1    | pMTL22 containing MluI fragment of <i>E. coli</i> K-12 containing <i>yjeT</i> and the first 1297 of 1299 bp of <i>purA</i>                                                                                                                                                       | This study |
| pBBMC2    | pMTL22 containing MluI fragment of <i>E. coli</i> K-12 containing <i>yjxX</i> , <i>ytjC</i> , the last 81 of 327 bp of <i>trpR</i> , and the last 321 of 870 bp of <i>rob</i>                                                                                                    | This study |
| pBBMC4    | pMTL22 containing MluI fragment of <i>E. coli</i> K-12 containing <i>rnb</i> , the last 216 of 2676 bp of <i>acnA</i> , the last 92 bp of 591 bp of <i>ribA</i> , the first 280 of 1986 bp of <i>gmr</i> , and the last 527 of 1128 bp of <i>yciW</i> .                          | This study |
| pBBMC5    | pMTL22 containing MluI fragment of <i>E. coli</i> K-12 containing <i>nepl</i> , <i>nlpA</i> , <i>yciS</i> , the last 802 of 924 bp of <i>yciL</i> , the last 44 of 453 bp of <i>yciN</i> , the last 181 of 762 bp of <i>ydeO</i> , and the first 606 of 1683 bp of <i>ydeN</i> . | This study |
| pBBMC1i   | pBBMC1 with <i>yjeT</i> and <i>purA</i> inactivated by removal of 1205 bp HindIII fragment                                                                                                                                                                                       | This study |
| pBBMC2i   | pBBMC2 with <i>yjxX</i> inactivated by removal of the 670 bp BamHI fragment                                                                                                                                                                                                      | This study |
| pBBMC4i   | pBBMC4 with <i>rnb</i> inactivated by removal of the 709 bp Sall fragment                                                                                                                                                                                                        | This study |
| pBBMC5i-1 | pBBMC5 with <i>nepl</i> inactivated by removal of the 2149 bp Bpu10I fragment                                                                                                                                                                                                    | This study |
| pBBMC5i-2 | pBBMC5 with <i>yciS</i> and <i>nepl</i> inactivated by removal of the 2902 bp Accl fragment                                                                                                                                                                                      | This study |
| pBBMC5i-3 | pBBMC5 with <i>nlpA</i> inactivated by removal of the 1620 bp BgIII – BspMI fragment                                                                                                                                                                                             | This study |

**Table 4.** Suppressors of *rdgB recA* inviability. Inactivational suppressors which had two or more independent hits were selected for further analysis as in-frame deletion mutants.

| Insertion Suppressors Cumulative |             |                                                                 |
|----------------------------------|-------------|-----------------------------------------------------------------|
| Hits                             | Gene        | Function                                                        |
| 18                               | <i>nfi</i>  | Endonuclease V                                                  |
| 15                               | <i>dgt</i>  | dGTP triphosphohydrolase                                        |
| 9                                | <i>tdk</i>  | Thymidine / deoxyuridine kinase                                 |
| 5                                | <i>hpt</i>  | Guanine / hypoxanthine phosphoribosyltransferase                |
| 3                                | <i>purR</i> | Transcriptional repressor                                       |
| 3                                | <i>yecT</i> | Hypothetical protein                                            |
| 3                                | <i>yrdD</i> | Putative DNA topoisomerase                                      |
| 2                                | <i>deoB</i> | Phosphopentose mutase                                           |
| 2                                | <i>deoD</i> | Purine nucleoside phosphorylase                                 |
| 2                                | <i>dusB</i> | Dihydrouridine synthase / (fis transcriptional regulator)       |
| 2                                | <i>glnG</i> | NtrC transcriptional regulator of glutamine biosynthesis        |
| 2                                | <i>gmk</i>  | Deoxyguanylate kinase                                           |
| 2                                | <i>hdfR</i> | Negative regulator of flagellar master operon                   |
| 2                                | <i>putA</i> | Transcriptional repressor of put operon / proline dehydrogenase |
| 2                                | <i>putP</i> | Transmembrane proline transporter                               |
| 2                                | <i>rpoC</i> | RNA polymerase $\beta'$ subunit                                 |
| 1                                | <i>dcd</i>  | Deoxycytosine deaminase                                         |
| 1                                | <i>hupA</i> | HU transcription regulator                                      |
| 1                                | <i>nudC</i> | NADH pyrophosphatase                                            |
| 1                                | <i>nupC</i> | Nucleoside (cytosol) to periplasm transporter                   |
| 1                                | <i>orn</i>  | Oligoribonuclease                                               |
| 1                                | <i>polB</i> | DNA polymerase II                                               |
| 1                                | <i>rrlA</i> | 23S Ribosomal RNA                                               |
| 1                                | <i>sapA</i> | Peptide uptake ABC transporter                                  |
| 1                                | <i>sapB</i> | Peptide uptake ABC transporter                                  |
| 1                                | <i>sapF</i> | Peptide uptake ABC transporter                                  |
| 1                                | <i>seqA</i> | Negative modulator of initiation of DNA replication             |

|   |      |                                                                   |
|---|------|-------------------------------------------------------------------|
| 1 | thrU | Threonine tRNA U                                                  |
| 1 | tufB | Elongation factor Tu                                              |
| 1 | waaG | LPS glucosyltransferase I (Generates UDP)                         |
| 1 | yacF | Conserved protein                                                 |
| 1 | yaeH | Conserved protein                                                 |
| 1 | ydeH | Conserved protein                                                 |
| 1 | ygfK | Putative oxidoreductase Fe-S subunit, possible selenate reductase |
| 1 | yifE | Conserved protein                                                 |
| 1 | ypjB | Predicted protein                                                 |

**94 total hits**

**Multicopy suppressors  
Cumulative**

| Hits | Gene | Function                               |
|------|------|----------------------------------------|
| 29   | yjjX | ITPase/XTPase                          |
| 16   | purA | Subunit of adenylosuccinate synthetase |
| 7    | rnb  | Ribonuclease II                        |
| 1    | nepl | Nucleoside efflux permease-inosine     |

**53 total hits**

## References

1. Chambers, S.P., et al., *The pMTL nic- cloning vectors. I. Improved pUC polylinker regions to facilitate the use of sonicated DNA for nucleotide sequencing*. Gene, 1988. **68**(1): p. 139-49.
2. Kuzminov, A. and F.W. Stahl, *Stability of linear DNA in recA mutant Escherichia coli cells reflects ongoing chromosomal DNA degradation*. J Bacteriol, 1997. **179**(3): p. 880-8.
